# Supplementary material for: Novel one pot synthesis and spectroscopic characterization of a folate-Mn3O4 nanohybrid for potential photodynamic therapeutic application
Source: Royal Society of Chemistry journal article supplement (doi:10.1039/c9ra06835j), 2019-01-01
Supplement: c9ra06835j1.pdf [file c9ra06835j1.pdf]

## SUPPLEMENTARY INFORMATION

### **Novel One Pot Synthesis and Spectroscopic Characterization of Folate-Mn<sub>3</sub>O<sub>4</sub> Nanohybrid for Potential Photodynamic Therapeutic Application**

**Susmita Mondal<sup>1</sup>, Aniruddha Adhiakari<sup>1</sup>, Monojit Das<sup>2</sup>, Soumendra Darbar<sup>3</sup>, Ahmed Alharbi<sup>4</sup>, Saleh A. Ahmed<sup>4</sup>, Siddhartha Sankar Bhattacharya<sup>2</sup>, Debasish Pal<sup>2</sup>, Samir Kumar Pal<sup>\*,1,2</sup>**

<sup>1</sup>Department of Chemical, Biological and Macromolecular Sciences,  
S. N. Bose National Centre for Basic Sciences,  
Block JD, Sector 3, Salt Lake, Kolkata-700106, India

<sup>2</sup>Department of Zoology, Uluberia College,  
University of Calcutta,  
Uluberia, Howrah-711315, India

<sup>3</sup>Research and Development Division,  
Dey's Medical Stores (Mfg.) Ltd,  
62, Bondel Road, Ballygunge, Kolkata-700019, India

<sup>4</sup>Department of Chemistry, Faculty of Applied Sciences,  
Umm Al-Qura University,  
21955 Makkah, Saudi Arabia

#### **\*Corresponding Author**

E-mail Address: [skpal@bose.res.in](mailto:skpal@bose.res.in)

Telephone: (+91)33 2335 5706-08

Fax: (+91)33 2335 3477

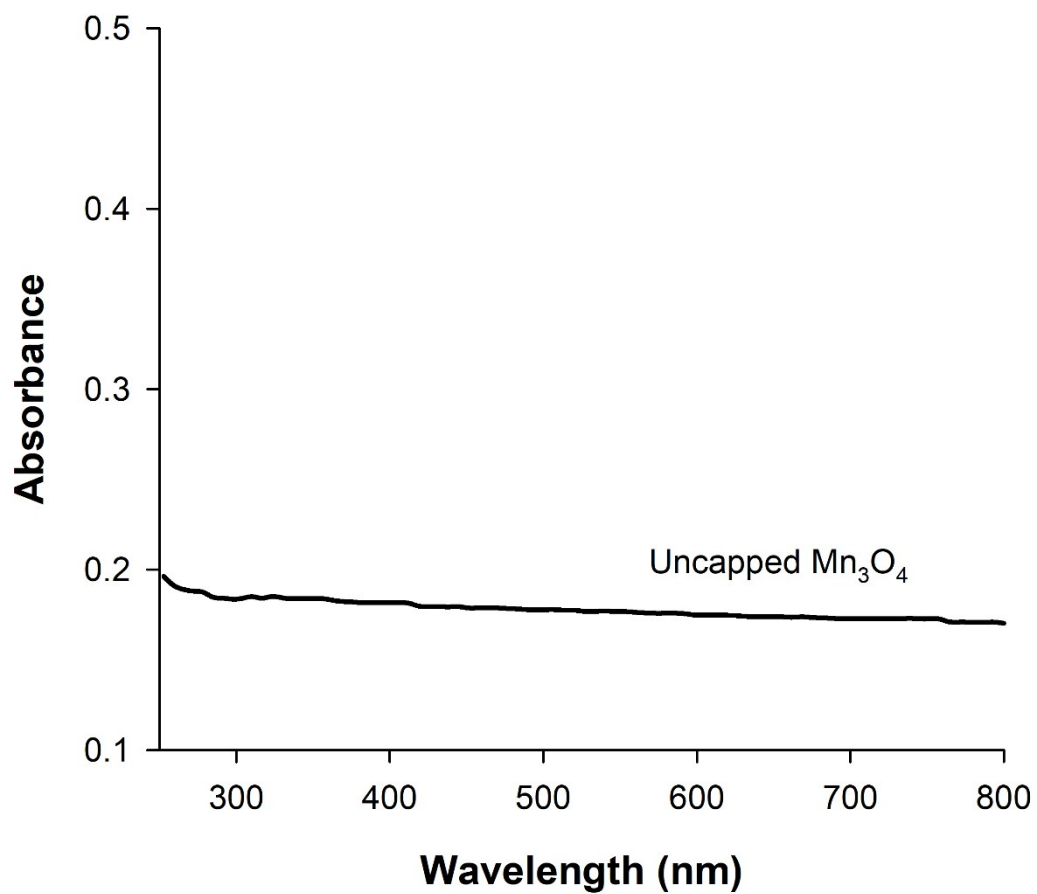

**Supplementary Figure S1. UV-Vis spectra for uncapped  $Mn_3O_4$  nanoparticle thin film on a quartz plate.**

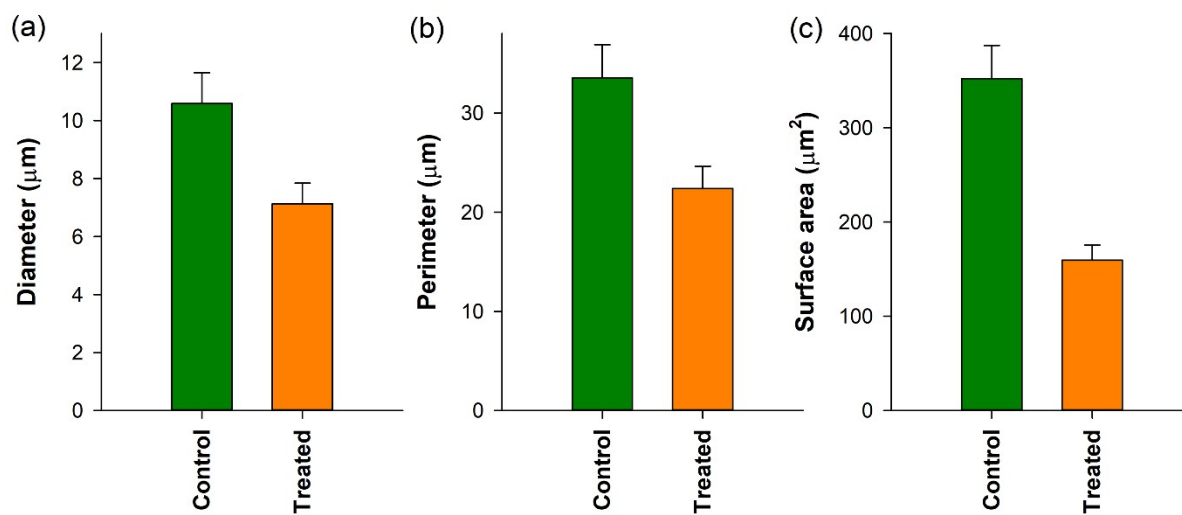

**Supplementary Figure S2. Comparison between various morphometric parameters of Control and FA-Mn<sub>3</sub>O<sub>4</sub> NP treated A549 cells.**
